# Supplementary material for: Transdifferentiation of the retina into pigmented cells in ocular retardation mice defines a new function of the homeodomain geneChx10
Source: Oxford University Press journal article supplement (doi:10.1242/dev.01300), 2004-09-30
Supplement: dev01300-sup-supptable1.pdf [file dev01300-sup-supptable1.pdf]

**Table S1. Riboprobe templates used in this study**

| Name         | Unigene name                                                       | Probe                                                                                                                                     | References                                  |
|--------------|--------------------------------------------------------------------|-------------------------------------------------------------------------------------------------------------------------------------------|---------------------------------------------|
| Mouse genes: |                                                                    |                                                                                                                                           |                                             |
| Chx10        | C. elegans ceh-10 homeodomain containing homolog                   | 3'UTR MscI/XhoI fragment from full-length mouse Chx10                                                                                     | Liu et al., 1994                            |
| Notch1       | Notch gene homolog 1 (Drosophila)                                  | EST – AW047868                                                                                                                            | Bao and Cepko, 1999                         |
| NeuroD       | Neurogenic differentiation 1                                       | Full length cDNA                                                                                                                          | Morrow et al., 1999                         |
| FGF15        | Fibroblast growth factor 15                                        | EST – BE952015                                                                                                                            | Thut et al., 2001                           |
| BTG2         | B-cell translocation gene 2, anti-proliferative                    | EST – AI851775                                                                                                                            | Iacopetti et al., 1999                      |
| E2F1         | E2F transcription factor 1                                         | EST – BE953801                                                                                                                            | Dagnino et al., 1997                        |
| GAP43        | Growth associated protein 43                                       | EST – BE949941                                                                                                                            | Reh et al., 1993                            |
| Stathmin 1   | Stathmin 1                                                         | EST – AI850105                                                                                                                            | Koppel et al., 1990                         |
| Gas1         | Growth arrest specific 1                                           | EST – AI846734                                                                                                                            | Lee et al., 2001                            |
| WFDC1        | WAP four-disulfide core domain 1                                   | EST – BF465460                                                                                                                            | Larsen et al., 2000                         |
| Pax6         | Paired box gene 6                                                  | Full length cDNA, gift from H. Matsunami                                                                                                  | Walther and Gruss, 1991                     |
| MITF         | Microphthalmia-associated transcription factor                     | Full length M-form probe                                                                                                                  | Hodgkinson et al., 1993                     |
| TFEC         | Transcription factor EC                                            | Full coding sequence RT-PCR product:<br>5'-ATGACCTTTGACTGTCGGGTATGC-3',<br>5'-AGCCTGTTGCGGCTTACAACCTC-3'                                  |                                             |
| TRPM1        | Transient receptor potential cation channel, subfamily M, member 1 | Partial cDNA RT-PCR product: 5'-TGGCTGACAACGGCACC-3',<br>5'-GCTGATACGACTGGGACTTGCT-3'                                                     | Miller et al., 2004                         |
| DCT          | Dopachrome tautomerase                                             | 1200 bp cDNA gift from H. Arnheiter                                                                                                       | Steel et al., 1992; Nakayama et al., 1998   |
| Tyrosinase   | Tyrosinase                                                         | 1978 bp cDNA of coding sequence gift from H. Arnheiter                                                                                    | Beerman et al., 1992; Nakayama et al., 1998 |
| Cyclin E1    | Cyclin E1                                                          | EST – BF462594                                                                                                                            |                                             |
| Dll1         | Delta-like 1 (Drosophila)                                          | EST – AW047187                                                                                                                            | Bao and Cepko, 1999; Henrique et al., 1997  |
| Math5        | Atonal homolog 7 (Drosophila)                                      | EST – BE951657                                                                                                                            | Yang et al., 1993                           |
| Brn3b        | POU domain, class 4, transcription factor 2                        | EST – BE951391                                                                                                                            | Gan et al., 1996                            |
| Hes1         | Hairy and enhancer of split 1 (Drosophila)                         | EST – BI557608                                                                                                                            | Tomita et al., 1996                         |
| Cyclin D1    | Cyclin D1                                                          | EST – AI850048                                                                                                                            | Sicinski et al., 1995                       |
| SNAP25       | Synaptosomal-associated protein 25                                 | EST – AI843805                                                                                                                            | Catsicas et al., 1992                       |
| CRHBP        | Corticoliberin-binding protein                                     | EST – AI854101                                                                                                                            | Blackshaw et al., 2004                      |
| p57          | Cyclin-dependent kinase inhibitor 1C                               | Full length cDNA                                                                                                                          | Dyer and Cepko, 2000                        |
| Otx1         | Orthodenticle homolog 1 (Drosophila)                               | EST – BE988140                                                                                                                            | Acampora et al., 1996                       |
| CD63         | Cd63 antigen                                                       | EST – AI838302                                                                                                                            |                                             |
| Otx2         | Orthodenticle homolog 2 (Drosophila)                               | 3' UTR clone pOtd9                                                                                                                        | Ang et al., 1994; Bovolenta et al., 1997    |
| IGF2         | Insulin-like growth factor 2                                       | EST – BF466901                                                                                                                            | Ohlsson et al., 1994                        |
| Chick genes: |                                                                    |                                                                                                                                           |                                             |
| MMP115       | 115-kDa melanosomal matrix protein                                 | Full length cDNA, gift from G. Eguchi                                                                                                     | Mochii et al., 1998                         |
| MITF         | Microphthalmia-associated transcription factor                     | Full length cDNA clone cmi9, gift from G. Eguchi                                                                                          | Mochii et al., 1998                         |
| TFEC         | Transcription factor EC                                            | 5' partial cDNA described in materials and methods                                                                                        |                                             |
| DCT          | Dopachrome tautomerase                                             | 3' coding sequence, RT-PCR product:<br>5'-GGCCAAGAGACTCGGGTGAACAG-3',<br>5'-AAGGGAACAAAGCCAAGGCACTA-3'                                    | April et al., 1998                          |
| Six3         | Sine oculis-related homeobox 3 homolog (Drosophila)                | 3'UTR 0.2Kb fragment from full length cSix3 (accession number AY373324) amplified using<br>5'-CCAAGCTTAGAGACAGAGCGGCGGCT-3' and T3 primer |                                             |
| Chx10        | C. elegans ceh-10 homeodomain containing homolog                   | full length cDNA                                                                                                                          | Chen and Cepko, 2000                        |
| Chx10 3'UTR  | homolog                                                            | 3'UTR 0.85Kb fragment from full length cChx10 amplified using<br>5'-ATCTCGAGCCAGGCTACCCAGCCTG-3' and T3 primer                            |                                             |

All genes studied by in situ hybridization in Figs 3, S1 and S2 are shown. The common name referred throughout the text is listed, as is the associated Unigene name. Probes include EST or PCR templates. References refer to the origin of the riboprobe template as well as published expression patterns (referred to the Results section).

## References

- Acampora, D., Mazan, S., Avantaggiato, V., Barone, P., Tuorto, F., Lallemand, Y., Brulet, P. and Simeone, A.** (1996). Epilepsy and brain abnormalities in mice lacking the Otx1 gene. *Nat. Genet.* **14**, 218-222.
- Ang, S. L., Conlon, R. A., Jin, O. and Rossant, J.** (1994). Positive and negative signals from mesoderm regulate the expression of mouse Otx2 in ectoderm explants. *Development* **120**, 2979-2989.
- April, C. S., Jackson, I. J. and Kidson, S. H.** (1998). Molecular cloning and sequence analysis of a chicken cDNA encoding tyrosinase-related protein-2/DOPAchrome tautomerase. *Gene* **219**, 45-53.
- Bao, Z. Z. and Cepko, C. L.** (1997). The expression and function of Notch pathway genes in the developing rat eye. *J. Neurosci.* **17**, 1425-1434.
- Beermann, F., Schmid, E. and Schutz, G.** (1992). Expression of the mouse tyrosinase gene during embryonic development: recapitulation of the temporal regulation in transgenic mice. *Proc. Natl. Acad. Sci. USA* **89**, 2809-2813.
- Blackshaw, S., Harpavat, S., Trimarchi, J., Cai, L., Huang, H., Kuo, W. P., Fraioli, R. E., Choi, S.-H., Yung, R., Asch, E., Wong, W. H. and Cepko, C. L.** (2004). Genomic analysis of mouse retinal development. *PLoS Biol.* (in press).
- Bovolenta, P., Mallamaci, A., Briata, P., Corte, G. and Boncinelli, E.** (1997). Implication of OTX2 in pigment epithelium determination and neural retina differentiation. *J. Neurosci.* **17**, 4243-4252.
- Catsicas, S., Catsicas, M., Keyser, K. T., Karten, H. J., Wilson, M. C. and Milner, R. J.** (1992). Differential expression of the presynaptic protein SNAP-25 in mammalian retina. *J. Neurosci. Res.* **33**, 1-9.
- Chen, C. M. and Cepko, C. L.** (2000). Expression of Chx10 and Chx10-1 in the developing chicken retina. *Mech. Dev.* **90**, 293-297.
- Dagnino, L., Fry, C. J., Bartley, S. M., Farnham, P., Gallie, B. L. and Phillips, R. A.** (1997). Expression patterns of the E2F family of transcription factors during mouse nervous system development. *Mech. Dev.* **66**, 13-25.
- Dyer, M. A. and Cepko, C. L.** (2000). p57(Kip2) regulates progenitor cell proliferation and amacrine interneuron development in the mouse retina. *Development* **127**, 3593-3605.
- Gan, L., Xiang, M., Zhou, L., Wagner, D. S., Klein, W. H. and Nathans, J.** (1996). POU domain factor Brn-3b is required for the development of a large set of retinal ganglion cells. *Proc. Natl. Acad. Sci. USA* **93**, 3920-3925.
- Henrique, D., Hirsinger, E., Adam, J., Le Roux, I., Pourquie, O., Ish-Horowicz, D. and Lewis, J.** (1997). Maintenance of neuroepithelial progenitor cells by Delta-Notch signalling in the embryonic chick retina. *Curr. Biol.* **7**, 661-670.
- Hodgkinson, C. A., Moore, K. J., Nakayama, A., Steingrimsson, E., Copeland, N. G., Jenkins, N. A. and Arnheiter, H.** (1993). Mutations at the mouse microphthalmia locus are associated with defects in a gene encoding a novel basic-helix-loop-helix-zipper protein. *Cell* **74**, 395-404.
- Iacopetti, P., Michelini, M., Stuckmann, I., Oback, B., Aaku-Saraste, E. and Huttner, W. B.** (1999). Expression of the antiproliferative gene TIS21 at the onset of neurogenesis identifies single neuroepithelial cells that switch from proliferative to neuron-generating division. *Proc. Natl. Acad. Sci. USA* **96**, 4639-4644.
- Koppel, J., Bouterin, M. C., Doye, V., Peyro-Saint-Paul, H. and Sobel, A.** (1990). Developmental tissue expression and phylogenetic conservation of stathmin, a phosphoprotein associated with cell regulations. *J. Biol. Chem.* **265**, 3703-3707.
- Larsen, M., Ressler, S. J., Gerdes, M. J., Lu, B., Byron, M., Lawrence, J. B. and Rowley, D. R.** (2000). The WFDC1 gene encoding ps20 localizes to 16q24, a region of LOH in multiple cancers. *Mamm. Genome* **11**, 767-773.
- Miller, A. J., Du, J., Rowan, S., Hershey, C. L., Widlund, H. R. and Fisher, D. E.** (2004). Transcriptional regulation of the melanoma prognostic marker melastatin (TRPM1) by MITF in melanocytes and melanoma. *Cancer Res.* **64**, 509-516.
- Mochii, M., Mazaki, Y., Mizuno, N., Hayashi, H. and Eguchi, G.** (1998). Role of Mitf in differentiation and transdifferentiation of chicken pigmented epithelial cell. *Dev. Biol.* **193**, 47-62.
- Morrow, E. M., Furukawa, T., Lee, J. E. and Cepko, C. L.** (1999). NeuroD regulates multiple functions in the developing neural retina in rodent. *Development* **126**, 23-36.
- Nakayama, A., Nguyen, M. T., Chen, C. C., Opdecamp, K., Hodgkinson, C. A. and Arnheiter, H.** (1998). Mutations in microphthalmia, the mouse homolog of the human deafness gene MITF, affect neuroepithelial and neural crest-derived melanocytes differently. *Mech. Dev.* **70**, 155-166.
- Ohlsson, R., Hedborg, F., Holmgren, L., Walsh, C. and Ekstrom, T. J.** (1994). Overlapping patterns of IGF2 and H19 expression during human development: biallelic IGF2 expression correlates with a lack of H19 expression. *Development* **120**, 361-368.
- Reh, T. A., Tetzlaff, W., Ertlmaier, A. and Zwiers, H.** (1993). Developmental study of the expression of B50/GAP-43 in rat retina. *J. Neurobiol.* **24**, 949-958.
- Sicinski, P., Donaher, J. L., Parker, S. B., Li, T., Fazeli, A., Gardner, H., Haslam, S. Z., Bronson, R. T., Elledge, S. J. and Weinberg, R. A.** (1995). Cyclin D1 provides a link between development and oncogenesis in the retina and breast. *Cell* **82**, 621-630.
- Steel, K. P., Davidson, D. R. and Jackson, I. J.** (1992). TRP-2/DT, a new early melanoblast marker, shows that steel growth factor (c-kit ligand) is a survival factor. *Development* **115**, 1111-1119.
- Thut, C. J., Rountree, R. B., Hwa, M. and Kingsley, D. M.** (2001). A large-scale in situ screen provides molecular evidence for the induction of eye anterior segment structures by the developing lens. *Dev. Biol.* **231**, 63-76.
- Tomita, K., Ishibashi, M., Nakahara, K., Ang, S. L., Nakanishi, S., Guillemot, F. and Kageyama, R.** (1996). Mammalian hairy and Enhancer of split homolog 1 regulates differentiation of retinal neurons and is essential for eye morphogenesis. *Neuron* **16**, 723-734.
- Walthers, C. and Gruss, P.** (1991). Pax-6, a murine paired box gene, is expressed in the developing CNS. *Development* **113**, 1435-1449.
- Yang, Z., Ding, K., Pan, L., Deng, M. and Gan, L.** (2003). Math5 determines the competence state of retinal ganglion cell progenitors. *Dev. Biol.* **264**, 240-254.
