# Supplementary material for: Transdifferentiation of the retina into pigmented cells in ocular retardation mice defines a new function of the homeodomain geneChx10
Source: Oxford University Press journal article supplement (doi:10.1242/dev.01300), 2004-09-30
Supplement: dev01300-sup-supptable2.pdf [file dev01300-sup-supptable2.pdf]

Table S2. Genes upregulated in *or<sup>l</sup>* mutants by microarray analysis

| UNIQID   | Unigene   | Name                                                       | E12.5 | E12.5 swap | E13.5-1 | E13.5-1 swap | E13.5-2 | E13.5-2 swap |
|----------|-----------|------------------------------------------------------------|-------|------------|---------|--------------|---------|--------------|
|          | Mm.36217  | Transcription Factor EC (TFEC)                             | 6.65  | 11.11      | 4.23    | 4.35         | 3.86    | 3.85         |
| AI852420 | Mm.39913  | Leucine rich repeat protein 3, neuronal                    | 3     | 2.38       | 3.93    | 3.03         | 4.03    | 3.23         |
| AI851397 | Mm.4504   | Gap junction membrane channel protein alpha 1              | 3.34  | 2.78       | 2.46    | 1.89         | 3.27    | 2.63         |
| AI843797 | Mm.196110 | Hemoglobin alpha, adult chain 1                            | 2.23  | 1.85       | 2.02    | 1.59         | 3.77    | 3.33         |
| AI845279 | Mm.200924 | RIKEN cDNA 2700084L06 gene                                 | 2.32  | 1.69       | 2.45    | 1.39         | 4.06    | 2.44         |
| AI854349 | Mm.28405  | serum/glucocorticoid regulated kinase                      | 2.6   | 2.22       | 2.28    | 1.75         | 2.57    | 2.78         |
| AI845477 | Mm.170515 | I-kappa B alpha chain mRNA                                 | 2.24  | 1.59       | 2.13    | 1.49         | 4.11    | 2.5          |
| AI847573 | Mm.288626 | Protease, serine 25                                        | 1.73  | 1.18       | 2.07    | 1.23         | 4.59    | 2.86         |
| AI838302 | Mm.4426   | Cd63 antigen                                               | 1.4   | 1.75       | 2.36    | 2.27         | 2.83    | 2.86         |
|          | Mm.16340  | Fibroblast growth factor receptor 2                        | 2.53  | 3.03       | 1.41    | 1.49         |         |              |
| AI845640 | Mm.26101  | RIKEN cDNA D430039N05 gene                                 | 2.58  | 3.03       | 1.93    | 1.75         | 1.59    | 1.47         |
| AI838762 | Mm.276220 | hemoglobin, beta adult major chain                         | 1.62  | 1.18       | 1.93    | 1.22         | 3.75    | 2.27         |
| AI845491 | Mm.14796  | microsomal glutathione S-transferase 1                     | 2.5   | 1.92       | 2.15    | 1.79         | 1.75    | 1.45         |
| AI835174 | Mm.224836 | carbonic anhydrase 14                                      | 2.37  | 1.92       | 1.85    | 1.85         | 1.88    | 1.56         |
| AI851848 | Mm.4514   | aldehyde dehydrogenase family 1, subfamily A1              | 1.36  | 1.09       | 2.09    | 1.59         | 3.19    | 2.04         |
| AI846734 | Mm.22701  | Growth arrest specific 1                                   | 2.43  | 2.13       | 1.67    | 1.49         | 1.9     | 1.33         |
| AI838156 | Mm.156583 | carbonic anhydrase 8                                       | 1.21  | 1.18       | 1.67    | 1.22         | 3.75    | 1.89         |
| AI848419 | Mm.89136  | H3 histone, family 3A                                      | 1.71  | 1.45       | 2.32    | 1.61         | 2.09    | 1.59         |
| AI852943 | Mm.38496  | chondroitin sulfate proteoglycan 5                         | 1.76  | 1.41       | 1.67    | 1.49         | 2.3     | 1.82         |
| AI854206 | Mm.27816  | Hexosaminidase B                                           | 1.67  | 1.64       | 1.85    | 1.47         | 2.13    | 1.69         |
| AI834768 | Mm.274892 | RIKEN cDNA 1810027I20 gene                                 | 2.06  | 1.61       | 1.54    | 1.28         | 1.97    | 1.85         |
|          | Mm.4733   | Cyclin-dependent kinase inhibitor 2A (p16 INK4a)           | 1.72  | 1.33       | 2.16    | 1.52         | 2.1     | 1.52         |
| AI842572 | Mm.2241   | Rho, GDP dissociation inhibitor (GDI) beta                 | 1.44  | 2          | 1.5     | 2            | 1.57    | 1.75         |
| AI845761 | Mm.37613  | RIKEN cDNA 2010319C14 gene                                 | 1.19  | 1.35       | 1.94    | 1.45         | 2.42    | 1.92         |
| AI853186 | Mm.22220  | fatty acid binding protein 3, muscle and heart             | 1.51  | 2.04       | 1.14    | 2.38         | 1.26    | 1.85         |
| AI850915 | Mm.198803 | UDP-glucose ceramide glucosyltransferase                   | 2.07  | 2.33       | 1.26    | 1.43         | 1.49    | 1.61         |
| AI836483 | Mm.22699  | selenoprotein P, plasma, 1                                 | 1.72  | 1.35       | 1.9     | 1.45         | 2.04    | 1.69         |
| AI849606 | Mm.2135   | folate receptor 1 (adult)                                  | 1.64  | 1.67       | 1.14    | 2            | 1.54    | 2.08         |
| AI853837 |           | EST                                                        | 2.73  | 2.5        | 1.36    | 1.16         | 1.28    | 1.04         |
| AI851910 | Mm.100923 | dystrobrevin alpha                                         | 2.11  | 2.63       | 1.35    | 1.61         | 1.07    | 1.33         |
|          | Mm.1571   | Cadherin 11                                                | 2.1   | 2.04       | 1.67    | 1.35         | 1.44    | 1.35         |
| AI845827 | Mm.29391  | RIKEN cDNA 1110007F23 gene                                 | 1.57  | 1.43       | 1.53    | 1.54         | 1.91    | 1.85         |
| AI853444 | Mm.204    | RIKEN cDNA 2610042L04 gene                                 | 2.98  | 2.38       | 1.28    | 1.12         | 1.18    | 0.91         |
| AI851001 | Mm.578    | Insulin-like growth factor binding protein 5               | 2.48  | 2.04       | 1.2     | 1.32         | 1.36    | 1.41         |
| AI850263 | Mm.486    | Lysosomal membrane glycoprotein 2                          | 1.52  | 1.49       | 1.62    | 1.39         | 2.05    | 1.67         |
| AI836560 | Mm.20948  | transcobalmin II (Tcn2)                                    | 1.51  | 1.27       | 1.51    | 1.41         | 2.07    | 1.89         |
| AI842286 | Mm.27856  | protein tyrosine phosphatase, receptor type, K             | 1.74  | 1.82       | 1.38    | 1.72         | 1.38    | 1.56         |
| AI851745 | Mm.29027  | SPARC-like 1 (mast9, hev1n)                                | 1.23  | 1.96       |         | 1.67         | 1.51    | 0            |
| AI853697 | Mm.182434 | Follistatin-like                                           | 1.4   | 1.54       | 1.1     | 1.23         | 2.05    | 2.13         |
| AI851210 | Mm.34108  | RIKEN cDNA C030003H22 gene                                 | 1.88  | 2          | 1.39    | 1.45         | 1.41    | 1.28         |
| AI854781 | Mm.44814  | Transcription factor XLMO1 homolog                         | 1.69  | 1.39       |         | 1.43         | 1.53    | 1.75         |
| AI848129 | Mm.154529 | RIKEN cDNA 6430520M22 gene                                 | 2.15  | 2.08       | 1.24    | 1.39         | 1.27    | 1.1          |
| AI840291 | Mm.260244 | D430021N15 product:unknown EST                             | 1.66  | 1.59       | 1.14    | 1.69         | 1.25    | 1.92         |
| AI854164 | Mm.40243  | EST                                                        | 1.18  | 1.47       | 1.86    | 1.75         | 1.48    | 1.52         |
|          | Mm.2423   | Procollagen, type II, alpha 1                              | 1.42  | 1.32       | 1.91    | 1.64         | 1.52    | 1.27         |
| AI838713 | Mm.12715  | RIKEN cDNA 2310016C16 gene                                 | 1.55  | 1.1        | 1.74    | 1.16         | 2.11    | 1.32         |
| AI845303 | Mm.24873  | nucleolar protein family A, member 1                       | 1.35  | 1.61       | 1.24    | 1.45         | 2.13    | 1.2          |
| AI843783 | Mm.658    | solute carrier family 25, member 5                         | 1.85  | 1.12       | 1.54    | 1.06         | 2.09    | 1.33         |
| AI846715 | Mm.37938  | spondin 1, (f-spondin) extracellular matrix protein        | 1.75  | 1.23       |         | 1.09         | 1.94    | 1.43         |
| AI841883 |           | EST                                                        | 1.41  | 1.04       |         | 1            | 2.49    | 1.45         |
|          | Mm.3918   | ATP-binding cassette, sub-family A (ABC1), member 4 (ABCR) | 1.22  | 1.19       | 0.77    | 0.83         | 2.28    | 2.56         |
| AI851312 | Mm.27230  | RNA binding motif, single stranded interacting protein 1   | 1.36  | 1.75       | 1.43    | 1.49         | 1.37    | 1.39         |
| AI849044 | Mm.28144  | apoptosis related protein APR-3                            | 1.32  | 1.28       | 1.61    | 1.82         | 1.55    | 1.22         |
| AI834785 | Mm.142760 | RIKEN cDNA E130016I23 gene                                 | 1.28  | 1.27       | 1.65    | 1.37         | 1.67    | 1.45         |
|          | Mm.3608   | Paired box gene 6 (Pax6)                                   | 1.04  | 1.22       | 1.69    | 1.39         | 1.83    | 1.54         |
| AI845199 | Mm.22699  | selenoprotein P, plasma, 1                                 | 1.45  | 1.15       | 1.28    | 1.56         | 1.67    | 1.52         |
| AI848342 | Mm.30064  | gamma-aminobutyric acid receptor associated protein        | 1.46  | 1.19       | 1.61    | 1.54         | 1.55    | 1.28         |
|          | Mm.168789 | Cyclin-dependent kinase inhibitor 1C (p57)                 | 1     | 1.06       | 1.69    | 1.41         | 1.77    | 1.64         |
| AI854333 | Mm.121878 | tropomyosin 1, alpha                                       | 1.37  | 1.43       | 1.45    | 1.72         | 1.18    | 1.43         |
| AI836902 | Mm.24118  | Glutathione S-transferase, theta 2                         | 1.43  | 1.16       | 1.7     | 1.23         | 1.86    | 1.22         |
| AI841689 | Mm.29658  | chemokine-like factor super family 3                       | 1.26  | 1.22       | 1.24    | 2.04         | 1.2     | 1.54         |
| AI846379 | Mm.213114 | RIKEN cDNA 9130423L19 gene                                 | 1.48  | 1.2        | 1.52    | 1.15         | 1.74    | 1.41         |
| AI853807 | Mm.22271  | smt3-specific isopeptidase 1                               | 1.51  | 1.56       | 1.27    | 1.45         | 1.25    | 1.41         |
|          | Mm.201322 | Activity-dependent neuroprotective protein (ADNP)          | 1.66  | 1.49       | 1.17    | 1.75         | 1.24    | 1.14         |
|          |           | Paired box gene 2 (Pax2)                                   | 1.29  | 1.06       | 1.58    | 1.33         | 1.83    | 1.39         |
| AI845968 | Mm.7046   | Protective protein for beta-galactosidase                  | 1.56  | 1.28       | 1.18    | 1.35         | 1.31    | 1.69         |
| AI850677 | Mm.34977  | neuron navigator 1                                         | 1.84  | 1.41       | 1.51    | 1.12         | 1.35    | 1.11         |
| AI849964 | Mm.40272  | RIKEN cDNA 9930033H14 gene                                 | 1.3   | 1.22       | 1.45    | 1.59         | 1.38    | 1.33         |
| AI850370 | Mm.119265 | RIKEN cDNA 9430020K16 gene                                 | 1.65  | 1.67       | 1.27    | 1.32         | 1.17    | 1.2          |
| AI850161 | Mm.28771  | RIKEN cDNA 1110035H23 gene                                 | 1.19  | 1.3        | 1.24    | 1.45         | 1.41    | 1.61         |
| AI835916 | Mm.158897 | RIKEN cDNA 2900027G03 gene                                 | 1.64  | 1.25       | 1.44    | 1.28         | 1.43    | 1.16         |
| AI847949 | Mm.248937 | RIKEN cDNA 0610007H07 gene                                 | 1.3   | 1.23       | 1.35    | 1.25         | 1.59    | 1.49         |
| AI844522 | Mm.1945   | phosphatidylinositol-4-phosphate 5-kinase, type 1 alpha    | 1.5   | 1.3        | 1.51    | 1.22         | 1.41    | 1.28         |
| AI842777 | Mm.65357  | leucine-rich repeat LGI family, member 1                   | 1.33  | 1.35       | 1.54    | 1.37         | 1.18    | 1.45         |

|          |           |                                                             |      |      |      |      |      |      |
|----------|-----------|-------------------------------------------------------------|------|------|------|------|------|------|
| AI845880 | Mm.260164 | L-3-hydroxyacyl-Coenzyme A dehydrogenase, short chain       | 1.15 | 1.11 | 1.64 | 1.19 | 1.68 | 1.45 |
| AI844804 | Mm.197518 | lysosomal-associated protein transmembrane 4B               | 1.42 | 1.52 | 1.31 | 1.27 | 1.31 | 1.41 |
| AI853088 | Mm.182434 | Follistatin-like                                            | 1.29 | 1.52 | 1.19 | 1.3  | 1.36 | 1.59 |
| AI854552 | Mm.951    | interferon-induced protein with tetratricopeptide repeats 3 | 1.02 | 1.75 | 1.35 | 1.32 | 1.35 | 1.35 |
| AI851746 | Mm.30155  | ATPase, H+ transporting, V0 subunit C                       | 1.24 | 1.37 | 1.34 | 1.35 | 1.44 | 1.43 |
| AI854095 | Mm.139166 | IMAGE:5006616, mRNA                                         | 1.63 | 2.63 | 1.01 | 1.2  | 0.63 | 1.06 |
| AI848876 | Mm.22673  | Fc receptor, IgE, high affinity I, gamma                    | 1.27 | 1.3  | 1.38 | 1.2  | 1.57 | 1.45 |
| AI846973 |           | EST                                                         | 1.39 | 1.18 | 1.39 | 1.19 | 1.66 | 1.37 |
| AI839644 | Mm.7500   | Ferritin light chain 1                                      | 1.35 | 1.16 | 1.74 | 1.27 | 1.59 | 1.08 |
| AI854232 | Mm.8154   | Imprinted and ancient                                       | 1.56 | 1.3  | 1.33 | 1.12 | 1.51 | 1.25 |
| AI842171 | Mm.230635 | Heme oxygenase (decycling) 1                                | 0.89 | 1.43 | 1.32 | 1.49 | 1.46 | 1.49 |
| AI847838 | Mm.11218  | Ercc3                                                       | 1.08 | 1.35 | 1.54 | 1.54 | 1.13 | 1.45 |
| AI854187 | Mm.16340  | Fibroblast growth factor receptor 2                         | 1.34 | 1.72 | 1.07 | 1.37 | 1.08 | 1.52 |
| AI842667 | Mm.684    | Cathepsin C                                                 | 1.25 | 1.35 | 1.25 | 1.54 | 1.15 | 1.56 |
| AI842767 | Mm.28099  | Sterol O-acyltransferase 1                                  | 1.42 | 1.3  | 1.18 | 1.47 | 1.36 | 1.39 |
| AI839581 | Mm.259670 | Porcupine homolog (Drosophila)                              | 1.23 | 1.18 | 1.52 | 1.33 | 1.38 | 1.39 |
| AI839138 | Mm.77432  | thioredoxin interacting protein                             | 1.14 | 1.3  | 1.6  | 1.54 | 1.13 | 1.33 |
| AI850126 | Mm.43660  | Palmitoyl-protein thioesterase                              | 1.35 | 1.28 | 1.18 | 1.32 | 1.38 | 1.54 |
| AI846363 | Mm.260164 | L-3-hydroxyacyl-Coenzyme A dehydrogenase, short chain       | 1.13 | 1.18 | 1.42 | 1.43 | 1.36 | 1.54 |
| AI846398 | Mm.141021 | RIKEN cDNA 1110004C05 gene                                  | 1.47 | 1.23 | 1.44 | 1.3  | 1.39 | 1.23 |
| AI850638 | Mm.270278 | thyrotroph embryonic factor                                 | 1.11 | 1.47 | 1.11 | 1.59 | 1.18 | 1.28 |
| AI838693 | Mm.22699  | selenoprotein P, plasma, 1                                  | 1.4  | 1.27 | 1.42 | 1.27 | 1.37 | 1.28 |
| AI850670 | Mm.206505 | Tissue inhibitor of metalloproteinase 2                     | 1.45 | 1.32 | 1.37 | 1.59 | 1.05 | 1.23 |
| AI851537 | Mm.20829  | Epithelial membrane protein 3                               | 0.97 | 1.22 | 1.41 | 1.59 | 1.3  | 1.43 |
| AI849556 | Mm.25248  | expressed sequence AA960558                                 | 1.34 | 1.61 | 1.18 | 1.45 | 1.11 | 1.25 |
| AI849135 | Mm.4948   | RIKEN cDNA 1110048B16 gene                                  | 1.49 | 1.56 | 1.22 | 1.35 | 1.07 | 1.14 |
| AI848880 | Mm.381    | Adipose differentiation related protein                     | 1.34 | 1.28 | 1.36 | 1.27 | 1.32 | 1.27 |
| AI852792 | Mm.29648  | Degenerative spermatocyte homolog (Drosophila)              | 1.15 | 1.32 | 1.35 | 1.09 | 1.53 | 1.41 |
| AI838435 | Mm.34087  | RIKEN cDNA A730024A03 gene                                  | 1.37 | 1.39 | 1.36 | 1.41 | 1.32 | 1.01 |
| AI850788 | Mm.140496 | RIKEN cDNA 1110001M20 gene                                  | 1.24 | 1.14 | 1.45 | 1.27 | 1.55 | 1.23 |
| AI847599 | Mm.28362  | Immunoglobulin heavy chain 6                                | 1.18 | 1.35 | 1.31 | 1.41 | 1.38 | 1.25 |
| AI844356 | Mm.38055  | esterase 10                                                 | 1.15 | 1.45 | 1.3  | 1.45 | 1.36 | 1.18 |
| AI850349 | Mm.14530  | RAB1, member RAS oncogene family                            | 1.42 | 1.28 | 1.08 | 1.52 | 1.12 | 1.47 |
| AI843750 | Mm.7821   | Tumor protein D52-like 1                                    | 1.17 | 1.43 | 1.32 | 1.52 | 1.16 | 1.18 |
| AI847007 | Mm.25203  | NCK-associated protein 1                                    | 1.45 | 1.39 | 1.45 | 1.25 | 1.19 | 1.04 |
| AI847927 |           | EST                                                         | 1.34 | 1.49 | 1.07 | 1.52 | 1.04 | 1.32 |
| AI852636 | Mm.18494  | MAP kinase kinase 3                                         | 1.21 | 1.35 | 1.27 | 1.04 | 1.5  | 1.41 |
| AI852449 | Mm.12559  | heparan sulfate (glucosamine) 3-O-sulfotransferase 1        | 1.24 | 1.06 | 1.4  | 1.14 | 1.65 | 1.3  |
| AI844604 | Mm.3126   | Four and a half LIM domains 1                               | 1.48 | 1.15 | 1.26 | 1.45 | 1.27 | 1.19 |
| AI843396 |           | EST                                                         | 1.4  | 1.2  | 1.37 | 1.02 | 1.63 | 1.19 |
| AI851074 | Mm.17958  | recombination activating gene 1 gene activation             | 1.14 | 1.1  | 1.56 | 1.28 | 1.37 | 1.37 |
| AI845824 | Mm.104920 | Sorbitol dehydrogenase 1                                    | 1.09 | 1.1  | 1.59 | 1.35 | 1.62 | 1.08 |
| AI844081 | Mm.49689  | sarcospan                                                   | 1.17 | 1.67 | 1.35 | 1.14 | 1.19 | 1.32 |

Genes listed are those upregulated at least 1.3-fold. Genes listed without unique IDs are full-length clones from within our laboratory. Unigene numbers and full names are indicated. Data points include one E12.5 sample and two E13.5 samples with associated color swaps.
